# Supplementary material for: Three-Dimensional Analysis of the Interactions between hLDH5 and Its Inhibitors
Source: MDPI journal article supplement (doi:10.3390/molecules22122217), 2017-12-13
Supplement: s1 [file s1]

# Supplementary Materials

## Three-dimensional analysis of the interactions between *h*LDH5 and its inhibitors

Giulio Poli, Carlotta Granchi, Mohamed Aissaoui, Filippo Minutolo, Tiziano Tuccinardi  
E-mail: tiziano.tuccinardi@unipi.it

### Table of Contents

|                                                                                                                                              |     |
|----------------------------------------------------------------------------------------------------------------------------------------------|-----|
| <b>Figure S1.</b> Superimposed structures of <i>h</i> LDH5 showing the large and small domains                                               | S2  |
| <b>Figure S2.</b> Chemical structure of oxamate ( <b>1</b> ) and H-bond interactions                                                         | S3  |
| <b>Figure S3.</b> Chemical structure of <b>3</b> and X-ray structure of <i>h</i> LDH5 in complex with compound <b>3</b>                      | S4  |
| <b>Figure S4.</b> Chemical structure of <b>7</b> and X-ray structure of <i>h</i> LDH5 in complex with compound <b>7</b>                      | S5  |
| <b>Figure S5.</b> Chemical structure of <b>8</b> and X-ray structure of <i>h</i> LDH5 in complex with compound <b>8</b>                      | S5  |
| <b>Figure S6.</b> Chemical structure of <b>9</b> and X-ray structure of <i>h</i> LDH5 in complex with compound <b>9</b>                      | S6  |
| <b>Figure S7.</b> Chemical structure of <b>10</b> and X-ray structure of <i>h</i> LDH5 in complex with compound <b>10</b>                    | S6  |
| <b>Figure S8.</b> Chemical structure of <b>11</b> and X-ray structure of <i>h</i> LDH5 in complex with compound <b>11</b>                    | S7  |
| <b>Figure S9.</b> Chemical structure of <b>12</b> and X-ray structures of <i>h</i> LDH5 in complex with compound <b>12</b>                   | S8  |
| <b>Figure S10.</b> Chemical structure of <b>14</b> , <b>15</b> and X-ray structures of <i>h</i> LDH5 in complex with <b>14</b> and <b>15</b> | S9  |
| <b>Figure S11.</b> Schematic 2D representation of the <b>18</b> - <i>h</i> LDH5 and <b>19</b> - <i>h</i> LDH5 H-bond interactions            | S10 |
| <b>Figure S12.</b> Schematic 2D representation of the <b>20</b> - <i>h</i> LDH5 H-bond interactions                                          | S10 |

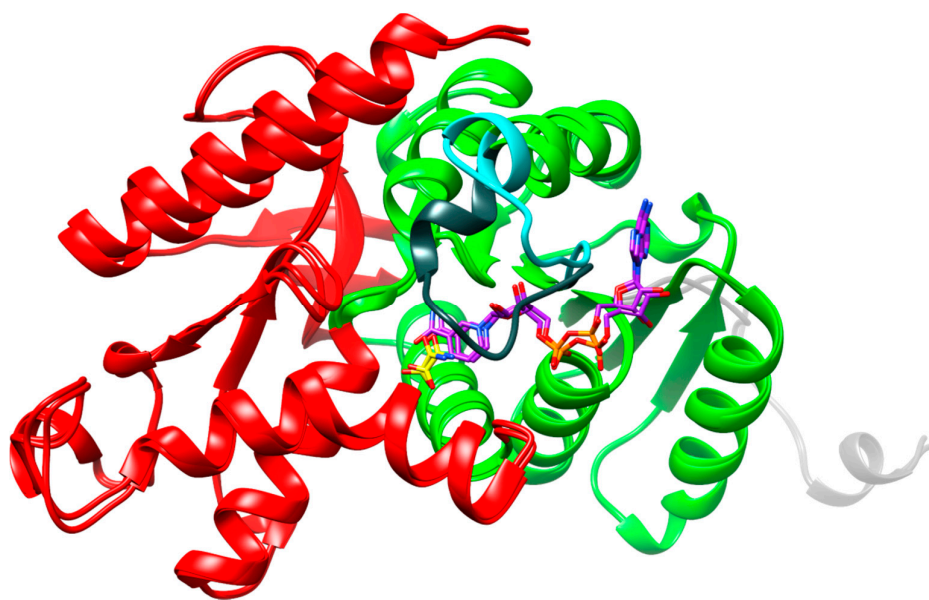

**Figure S1.** Superimposed structures of *h*LDH5 showing the large (green) and small (red) domains (PDB code 1I10). The active-site loop in the open (sky-blue) and closed (dark slate gray) conformation is highlighted. NADH and oxamate (**1**) are shown in purple and yellow, respectively.

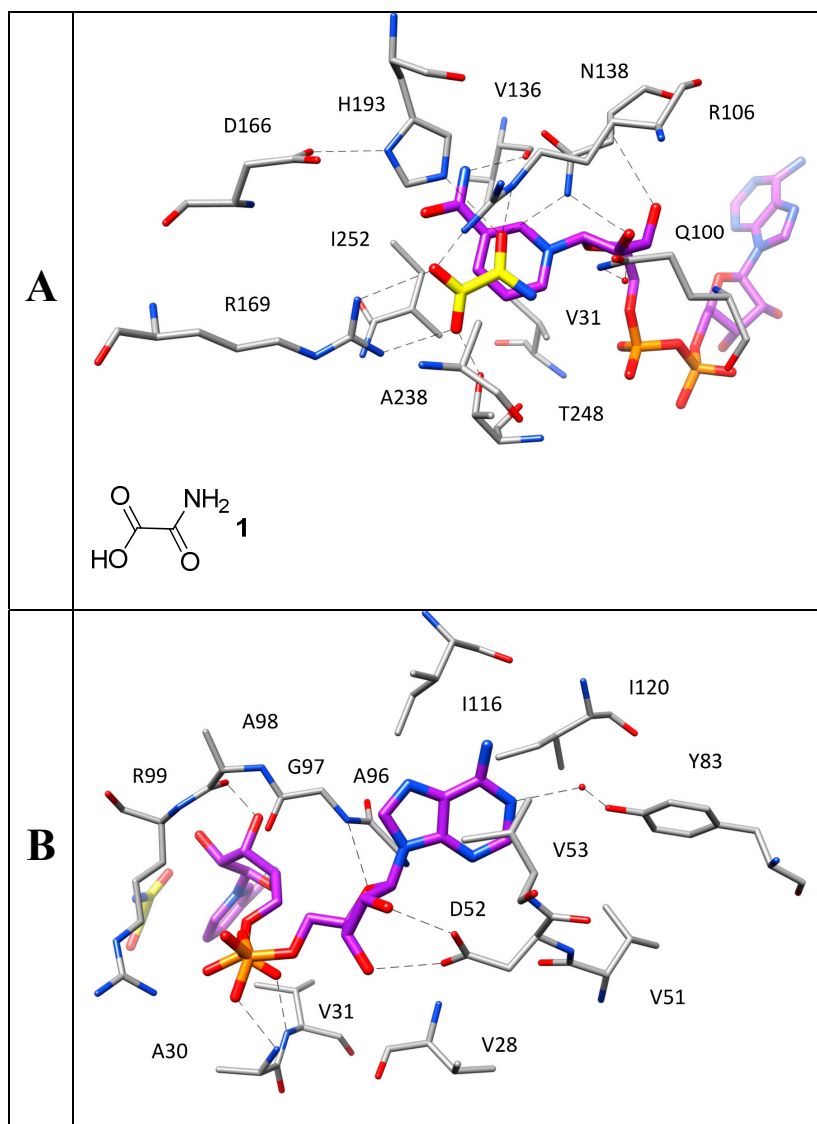

**Figure S2.** Chemical structure of oxamate (**1**) and H-bond interactions with *h*LDH-A identified in close proximity to the nicotinamide fragment of NADH, **1** and the residues delimiting the SBP and NBP (A), or between NADH and the residues delimiting the ABP (B) (PDB code 1I10). NADH and **1** are shown in purple and yellow, respectively.

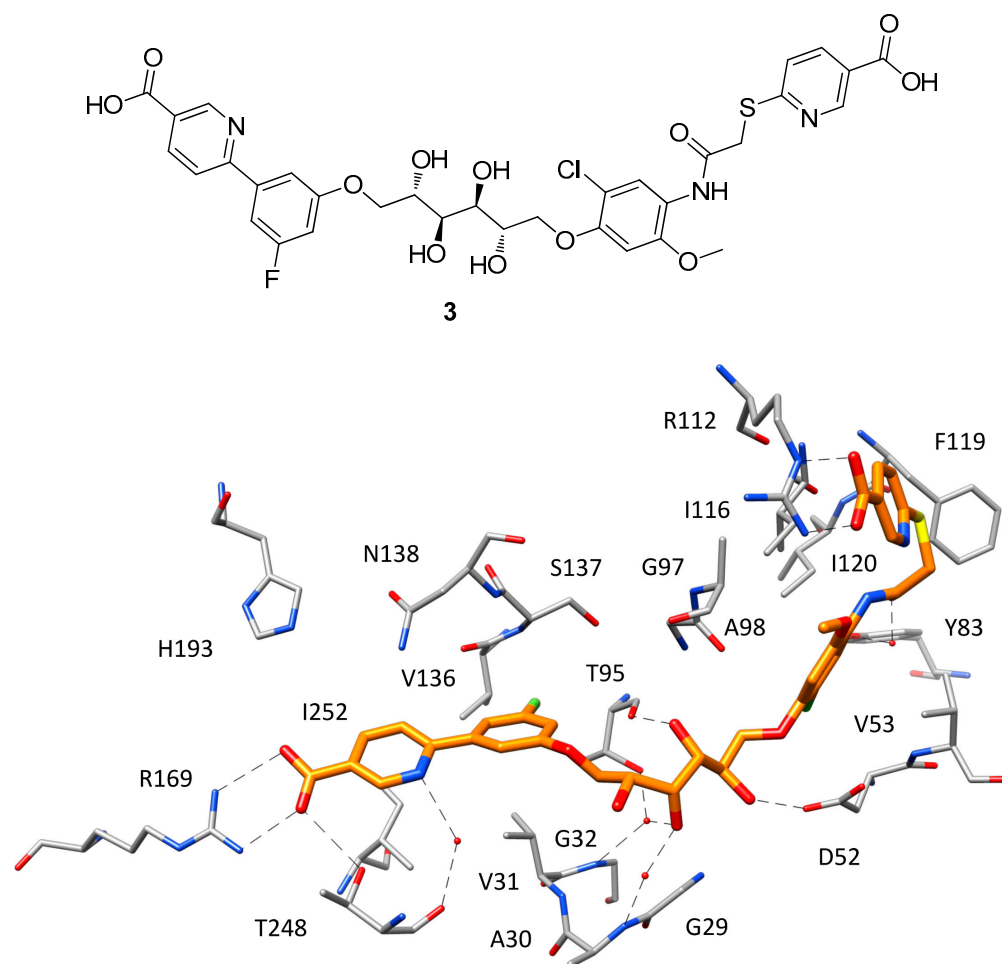

**Figure S3.** Chemical structure of **3** and X-ray structure of *h*LDH5 in complex with compound **3** (PDB code 4I9H). The active site residues interacting with the inhibitor are shown and the ligand-protein H-bonds are highlighted.

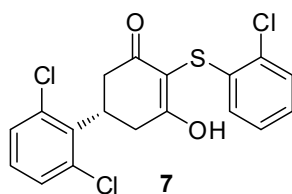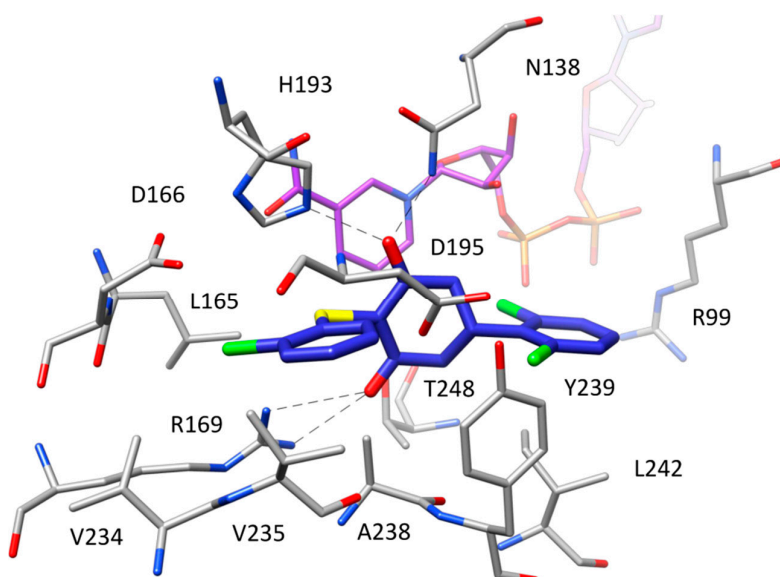

**Figure S4.** Chemical structure of **7** and X-ray structure of hLDH5 in complex with compound **7** (PDB code 4QO8). The active site residues interacting with the inhibitor are shown and the ligand-protein H-bonds are highlighted.

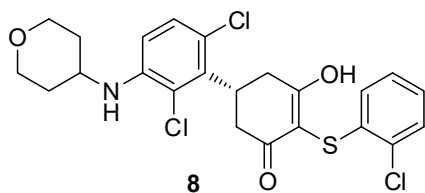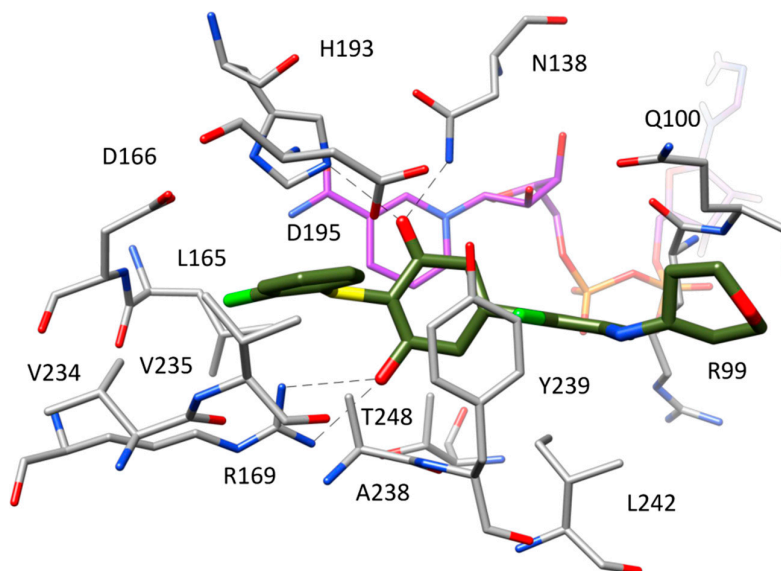

**Figure S5.** Chemical structure of **8** and X-ray structure of hLDH5 in complex with compound **8** (PDB code 4R69). The active site residues interacting with the inhibitor are shown and the ligand-protein H-bonds are highlighted.

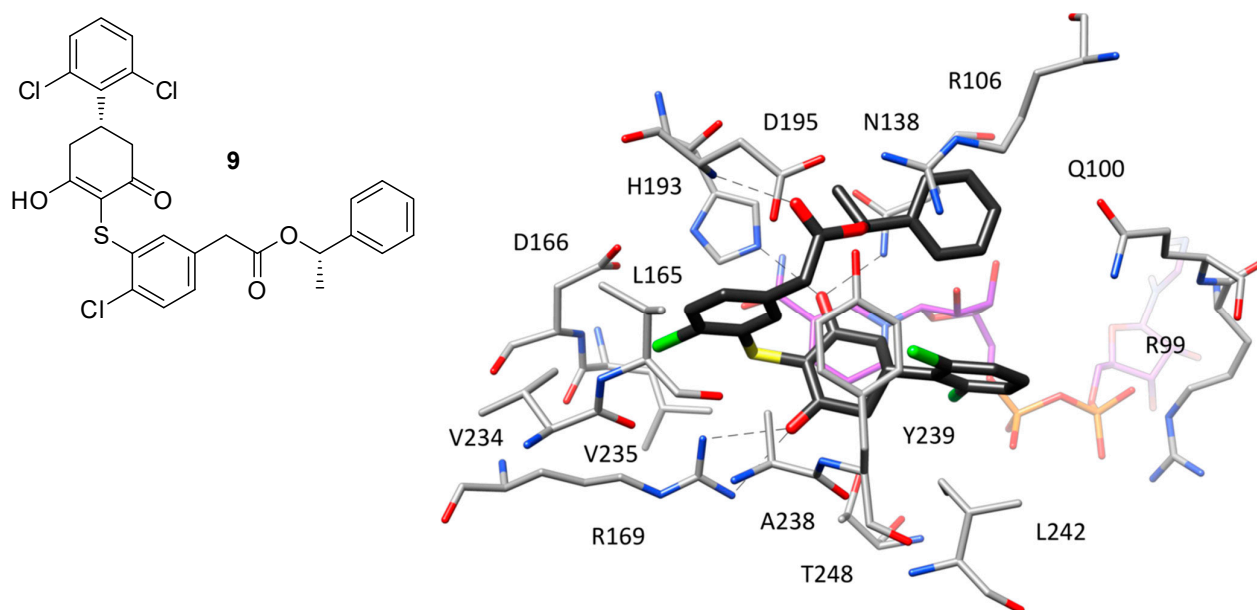

**Figure S6.** Chemical structure of **9** and X-ray structure of hLDH5 in complex with compound **9** (PDB code 4R68). The active site residues interacting with the inhibitor are shown and the ligand-protein H-bonds are highlighted

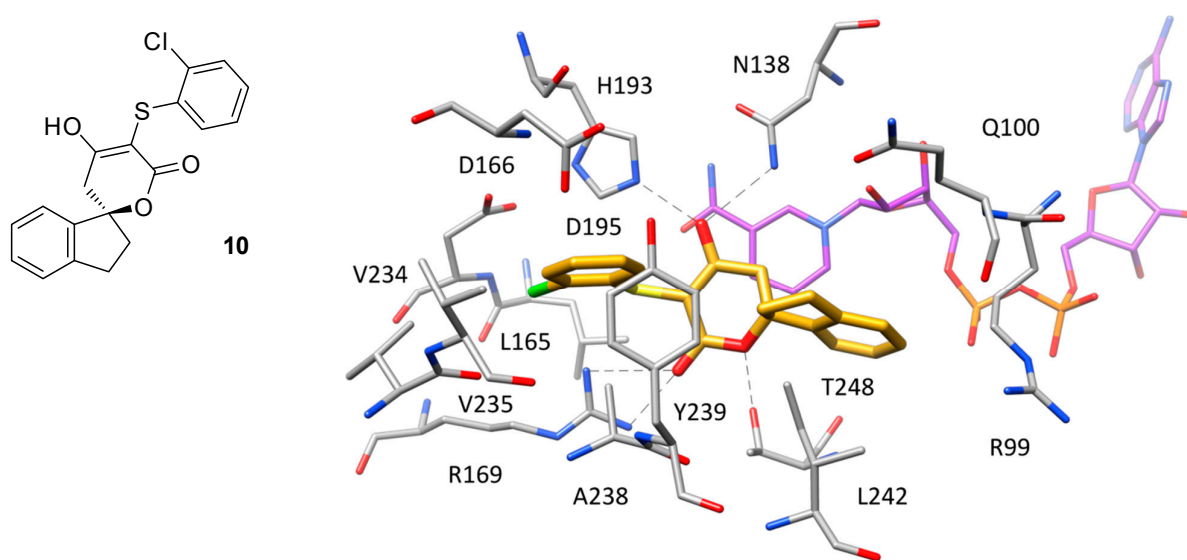

**Figure S7.** Chemical structure of **10** and X-ray structure of hLDH5 in complex with compound **10** (PDB code 4RLS). The active site residues interacting with the inhibitor are shown and the ligand-protein H-bonds are highlighted.

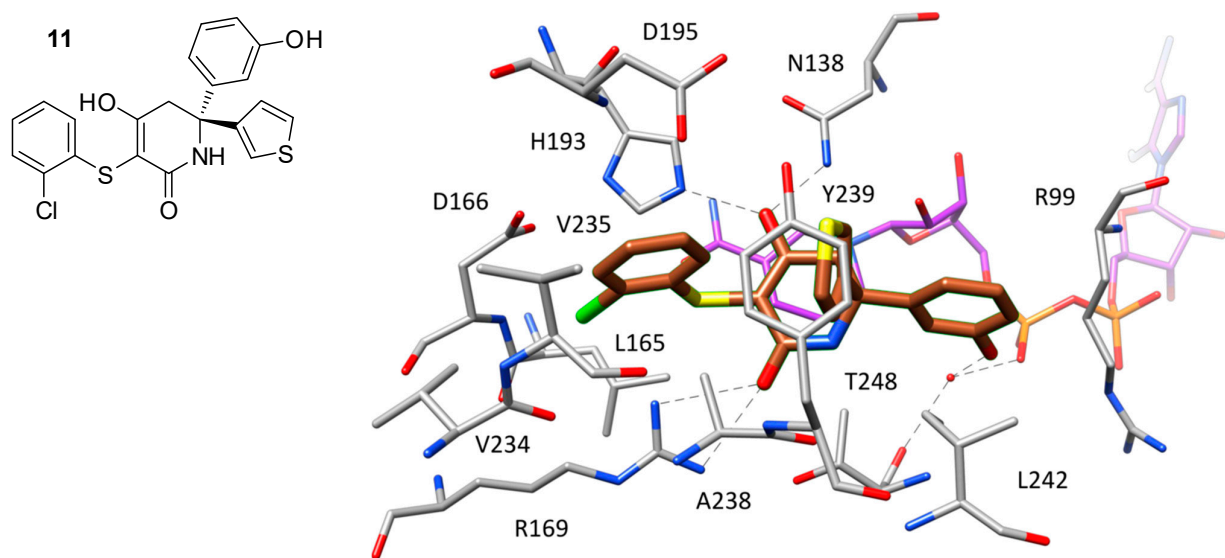

**Figure S8.** Chemical structure of **11** and X-ray structure of hLDH5 in complex with compound **11** (PDB code 5IXS). The active site residues interacting with the inhibitor are shown and the ligand-protein H-bonds are highlighted

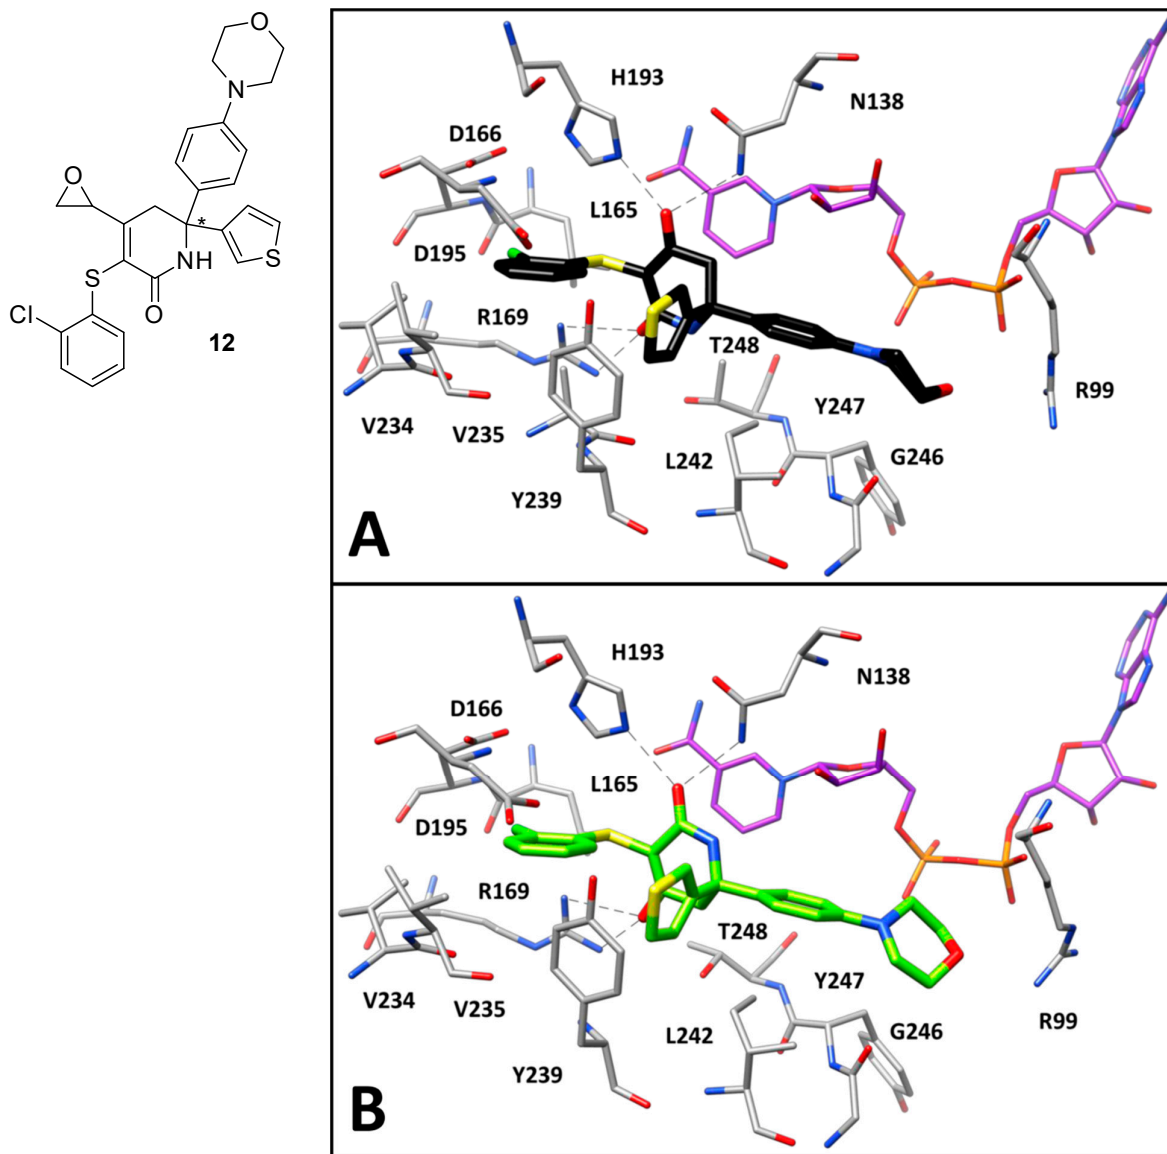

**Figure S9.** Chemical structure of **12** and (A) X-ray structures of *h*LDH5 in complex with compound *R*-**12** (PDB code 4ZVV); (B) X-ray structures of *h*LDH5 in complex with compound *S*-**12** (PDB code 5IXY). The active site residues interacting with the inhibitors are shown and the ligand-protein H-bonds are highlighted.



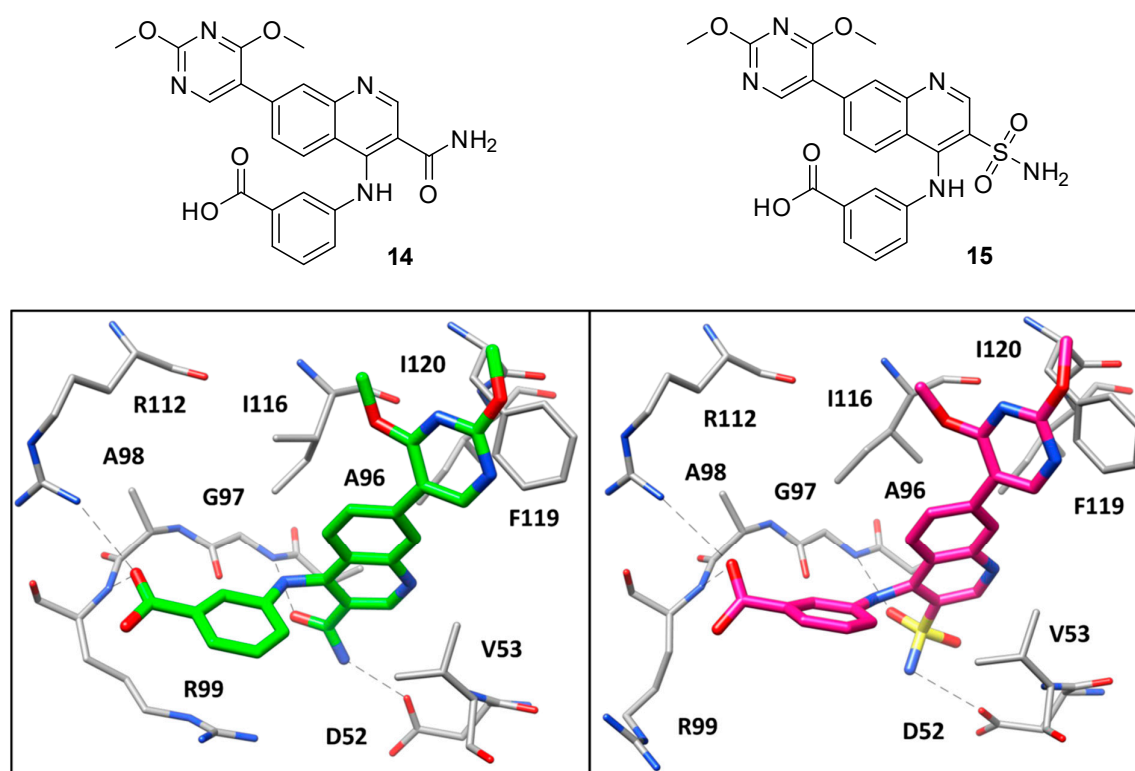

**Figure S10.** Chemical structure of **14** and **15** and (A) X-ray structures of *h*LDH5 in complex with compound **14** (PDB code 4QT0) and (B) compound **15** (PDB code 4QSM). The active site residues interacting with the inhibitors are shown and the ligand-protein H-bonds are highlighted.

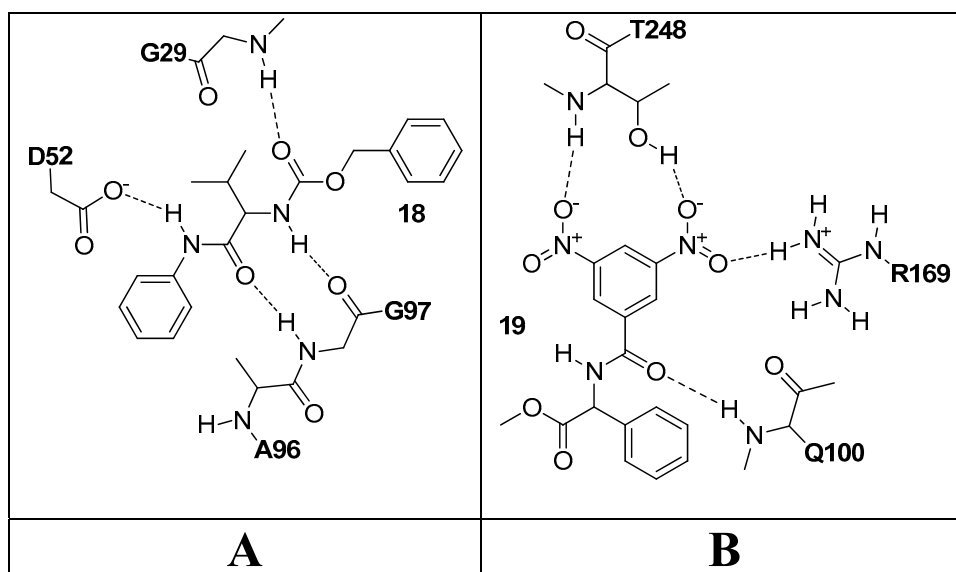

**Figure S11.** Schematic 2D representation of the **18**-LDH5 (1) and **19**-LDH5 (2) H-bond interactions.

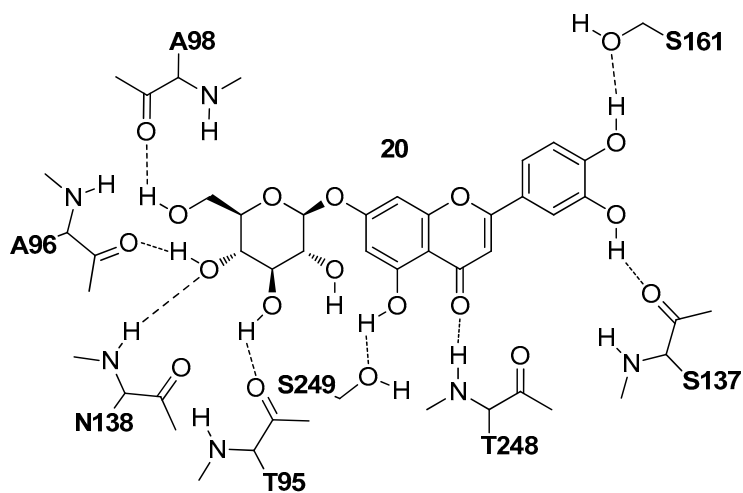

**Figure S12.** Schematic 2D representation of the **20**-LDH5 H-bond interactions.
